# Supplementary material
Source: ML conference proceedings conference paper supplement (https://proceedings.neurips.cc/paper_files/paper/2019/hash/a97da629b098b75c294dffdc3e463904-Abstract.html)
Supplement: Supplementary file [file a97da629b098b75c294dffdc3e463904-Supplemental.zip]

# First Exit Time Analysis of Stochastic Gradient Descent Under Heavy-Tailed Gradient Noise

## SUPPLEMENTARY DOCUMENT

Thanh Huy Nguyen<sup>1</sup>, Umut Şimşekli<sup>1,2</sup>, Mert Gürbüzbalaban<sup>3</sup>, Gaël Richard<sup>1</sup>

1: LTCL, Télécom Paris, Institut Polytechnique de Paris, France

2: Department of Statistics, University of Oxford, UK

3: Dept. of Management Science and Information Systems, Rutgers Business School, NJ, USA

### S1 More details on Assumption A 6

In this section, we provide the precise expressions of the constants given in Assumption A 6.

For a given  $\delta > 0$ ,  $t = K\eta$ , and for some  $C > 0$ , the step-size satisfies the following condition:

$$0 < \eta \leq \min \left\{ 1, \frac{m}{M^2}, \left( \frac{\delta^2}{2K_1 t^2} \right)^{\frac{1}{\gamma^2 + 2\gamma - 1}}, \left( \frac{\delta^2}{2K_2 t^2} \right)^{\frac{1}{2\gamma}}, \left( \frac{\delta^2}{2K_3 t^2} \right)^{\frac{\alpha}{2\gamma}}, \left( \frac{\delta^2}{2K_4 t^2} \right)^{\frac{1}{\gamma}} \right\},$$

where  $\varepsilon$  is as in (7), the constants  $m, M, b$  are defined by A3–A5 and

$$\begin{aligned} K_1 &\triangleq \frac{CM^{2+2\gamma}3^\gamma}{\varepsilon^2\sigma^2} \max \left\{ (2(b+m))^{\gamma^2}, 2^{\gamma^2} B^{2\gamma^2}, d\varepsilon^{2\gamma^2} R_1, d\varepsilon^{2\gamma^2} R_2 \right\}, \\ K_2 &\triangleq \frac{CM^{2+2\gamma}3^\gamma}{2\varepsilon^2\sigma^2} \left( \mathbb{E} \|W(0)\|^{2\gamma^2} + B^2/M^2 \right), \\ K_3 &\triangleq \frac{M^2 3^\gamma \varepsilon^{2\gamma-2} d^{2\gamma}}{2\sigma^2} \left( \frac{2^{2\gamma} \Gamma((1+2\gamma)/2) \Gamma(1-2\gamma/\alpha)}{\Gamma(1/2) \Gamma(1-\gamma)} \right), \\ K_4 &\triangleq \frac{M^2 3^\gamma \varepsilon^{2\gamma-2} d^{2\gamma}}{2\sigma^2} \left( 2^\gamma \Gamma\left(\frac{2\gamma+1}{2}\right) / \sqrt{\pi} \right), \end{aligned}$$

with

$$R_1 \triangleq \left( \frac{2^{2\gamma^2} \Gamma((1+2\gamma)/2) \Gamma(1-2\gamma^2/\alpha)}{\Gamma(1/2) \Gamma(1-\gamma^2)} \right), R_2 \triangleq \left( 2^{\gamma^2} \Gamma\left(\frac{2\gamma^2+1}{2}\right) / \sqrt{\pi} \right).$$

### S2 Proof of Theorem 2

*Proof.* Note that  $(W^1, \dots, W^K) \in A$  is equivalent to  $\bar{\tau}_{0,a}(\varepsilon) > K$ . Hence, from Lemma S4, the remaining task is to upper-bound  $\mathbb{P}[(W(\eta), \dots, W(K\eta)) \in A]$ :

$$\begin{aligned} \mathbb{P}[(W(\eta), \dots, W(K\eta)) \in A] &\leq \mathbb{P}[(W(\eta), \dots, W(K\eta)) \in A \cap B] + \mathbb{P}[(W(\eta), \dots, W(K\eta)) \in B^c] \\ &\leq \mathbb{P}[\tau_{\xi,a}(\varepsilon) > K\eta] + \mathbb{P}[(W(\eta), \dots, W(K\eta)) \in B^c], \end{aligned}$$

and to lower-bound it:

$$\mathbb{P}[(W(\eta), \dots, W(K\eta)) \in A] \geq \mathbb{P}[\tau_{-\xi,a}(\varepsilon) > K\eta] - \mathbb{P}[(W(\eta), \dots, W(K\eta)) \in B^c].$$

By Lemma S1, the final result follows.  $\square$

**Lemma S1.** *There exist constants  $C, C_1$  and  $C_\alpha$  such that:*

$$\begin{aligned} \mathbb{P}[(W(\eta), \dots, W(K\eta)) \in B^c] &\leq \frac{C_1(K\eta(d\varepsilon+1)+1)^\gamma e^{M\eta} M\eta}{\xi} + 1 - \left( 1 - C d e^{-\xi^2 e^{-2M\eta}(\varepsilon\sigma)^{-2}/(16d\eta)} \right)^K \\ &\quad + 1 - \left( 1 - C_\alpha d^{1+\alpha/2} \eta e^{\alpha M\eta} \varepsilon^\alpha \xi^{-\alpha} \right)^K, \end{aligned}$$

*Proof.* We have for  $t \in [k\eta, (k+1)\eta]$ ,

$$\begin{aligned}
\|W(t) - W(k\eta)\| &\leq \int_{k\eta}^t \|\nabla f(W(s))\| ds + \varepsilon \sigma \|B(t) - B(k\eta)\| + \varepsilon \|L^\alpha(t) - L^\alpha(k\eta)\| \\
&\leq \int_{k\eta}^t \|\nabla f(W(s)) - \nabla f(W(k\eta))\| ds + \eta \|\nabla f(W(k\eta))\| + \varepsilon \sigma \|B(t) - B(k\eta)\| \\
&\quad + \varepsilon \|L^\alpha(t) - L^\alpha(k\eta)\| \\
&\leq \int_{k\eta}^t M \|W(s) - W(k\eta)\|^\gamma ds + \eta (M \|W(k\eta)\|^\gamma + B) + \varepsilon \sigma \|B(t) - B(k\eta)\| \\
&\quad + \varepsilon \|L^\alpha(t) - L^\alpha(k\eta)\|.
\end{aligned}$$

For  $\gamma < 1$ , using that  $\|W(s) - W(k\eta)\|^\gamma \leq \|W(s) - W(k\eta)\| + 1$ , we get:

$$\begin{aligned}
\|W(t) - W(k\eta)\| &\leq \int_{k\eta}^t M \|W(s) - W(k\eta)\| ds + \eta (M \|W(k\eta)\|^\gamma + B + M) \\
&\quad + \varepsilon \sigma \sup_{t \in [k\eta, (k+1)\eta]} \|B(t) - B(k\eta)\| + \varepsilon \sup_{t \in [k\eta, (k+1)\eta]} \|L^\alpha(t) - L^\alpha(k\eta)\|.
\end{aligned}$$

Then the Gronwall lemma gives:

$$\begin{aligned}
\sup_{t \in [k\eta, (k+1)\eta]} \|W(t) - W(k\eta)\| &\leq e^{M\eta} \left[ \eta (M \|W(k\eta)\|^\gamma + B + M) + \varepsilon \sigma \sup_{t \in [k\eta, (k+1)\eta]} \|B(t) - B(k\eta)\| \right. \\
&\quad \left. + \varepsilon \sup_{t \in [k\eta, (k+1)\eta]} \|L^\alpha(t) - L^\alpha(k\eta)\| \right].
\end{aligned}$$

Hence,

$$\begin{aligned}
\max_{0 \leq k \leq K-1} \sup_{t \in [k\eta, (k+1)\eta]} \|W(t) - W(k\eta)\| &\leq e^{M\eta} \left[ \eta (M \max_{0 \leq k \leq K-1} \|W(k\eta)\|^\gamma + B + M) \right. \\
&\quad + \varepsilon \sigma \max_{0 \leq k \leq K} \sup_{t \in [k\eta, (k+1)\eta]} \|B(t) - B(k\eta)\| \\
&\quad \left. + \varepsilon \max_{0 \leq k \leq K-1} \sup_{t \in [k\eta, (k+1)\eta]} \|L^\alpha(t) - L^\alpha(k\eta)\| \right].
\end{aligned}$$

By Lemma 7.1 in [1], Lemma S4 in [2] and Markov's inequality, for any  $u > 0$ , we have:

$$\mathbb{P}[\max_{0 \leq k \leq K-1} \|W(k\eta)\|^\gamma \geq u] \leq \frac{\mathbb{E}[\max_{0 \leq k \leq K-1} \|W(k\eta)\|^\gamma]}{u} \leq \frac{C_1(K\eta(d\varepsilon + 1) + 1)^\gamma}{u},$$

where  $C_1$  is a constant independent of  $K, \eta, \varepsilon$  and  $d$ . By Lemma S3, we have:

$$\mathbb{P}[\max_{k \in [0, \dots, K-1]} \sup_{t \in [k\eta, (k+1)\eta]} \|B(t) - B(k\eta)\| \geq u] \leq 1 - \left(1 - Cde^{-u^2/(d\eta)}\right)^K$$

and

$$\mathbb{P}[\max_{k \in [0, \dots, K-1]} \sup_{t \in [k\eta, (k+1)\eta]} \|L^\alpha(t) - L^\alpha(k\eta)\| \geq u] \leq 1 - \left(1 - C_\alpha d^{1+\alpha/2} \eta u^{-\alpha}\right)^K.$$

Finally, we get:

$$\begin{aligned}
\mathbb{P}[(W(\eta), \dots, W(K\eta)) \in B^c] &\leq \mathbb{P}\left[\max_{0 \leq k \leq K-1} \sup_{t \in [k\eta, (k+1)\eta]} \|W(t) - W(k\eta)\| > \xi\right] \\
&\leq \mathbb{P}[e^{M\eta} M \max_{0 \leq k \leq K-1} \|W(k\eta)\|^\gamma \geq \xi/4] \\
&\quad + \mathbb{P}[e^{M\eta} \eta (B + M) \geq \xi/4] \\
&\quad + \mathbb{P}[e^{M\eta} \max_{k \in [0, \dots, K-1]} \sup_{t \in [k\eta, (k+1)\eta]} \|B(t) - B(k\eta)\| \geq (\varepsilon\sigma)^{-1} \xi/4] \\
&\quad + \mathbb{P}[e^{M\eta} \max_{k \in [0, \dots, K-1]} \sup_{t \in [k\eta, (k+1)\eta]} \|L^\alpha(t) - L^\alpha(k\eta)\| \geq \varepsilon^{-1} \xi/4] \\
&\leq \frac{C_1(K\eta(d\varepsilon + 1) + 1)^\gamma e^{M\eta} M \eta}{\xi} + 1 - \left(1 - Cde^{-\xi^2 e^{-2M\eta} (\varepsilon\sigma)^{-2} / (16d\eta)}\right)^K \\
&\quad + 1 - \left(1 - C_\alpha d^{1+\alpha/2} \eta e^{\alpha M\eta} \varepsilon^\alpha \xi^{-\alpha}\right)^K.
\end{aligned}$$

□

Now we prove the following lemma.

**Lemma S2.** *There exist constants  $C$  and  $C_\alpha$  such that:*

$$\begin{aligned}
\max_{k \in [0, \dots, K-1]} \mathbb{P}\left[\sup_{t \in [k\eta, (k+1)\eta]} \|B(t) - B(k\eta)\| \geq u\right] &\leq Cde^{-cu^2/(d\eta)}. \\
\max_{k \in [0, \dots, K-1]} \mathbb{P}\left[\sup_{t \in [k\eta, (k+1)\eta]} \|L^\alpha(t) - L^\alpha(k\eta)\| \geq u\right] &\leq C_\alpha d^{1+\alpha/2} \eta u^{-\alpha}.
\end{aligned}$$

*Proof.* To prove the results, we begin with the known results for Brownian motion and  $\alpha$ -stable Lévy motion:

$$\begin{aligned}
\mathbb{P}[|[B(1)]_i| \geq u] &\leq Ce^{-u^2}, \\
\mathbb{P}[|[L^\alpha(1)]_i| \geq u] &\leq C_\alpha u^{-\alpha},
\end{aligned}$$

where  $C$  and  $C_\alpha$  are positive constants,  $[B(1)]_i$  and  $[L^\alpha(1)]_i$  denote the  $i$ -th component of the motions respectively, for  $i$  from 1 to  $d$ . By reflection principle for Brownian motion and  $\alpha$ -stable Lévy motion, we have

$$\begin{aligned}
\mathbb{P}\left[\sup_{t \in [k\eta, (k+1)\eta]} |[B(t) - B(k\eta)]_i| \geq u\right] &\leq 2\mathbb{P}[|[B(\eta)]_i| \geq u] = 2\mathbb{P}[|[B(1)]_i| \geq u/\eta^{1/2}], \\
\mathbb{P}\left[\sup_{t \in [k\eta, (k+1)\eta]} |[L^\alpha(t) - L^\alpha(k\eta)]_i| \geq u\right] &\leq 2\mathbb{P}[|[L^\alpha(\eta)]_i| \geq u] = 2\mathbb{P}[|[L^\alpha(1)]_i| \geq u/\eta^{1/\alpha}].
\end{aligned}$$

Since  $\sup_{t \in [k\eta, (k+1)\eta]} \|B(t) - B(k\eta)\|^2 \leq \sum_{i=1}^d \sup_{t \in [k\eta, (k+1)\eta]} |[B(t) - B(k\eta)]_i|^2$ , we have

$$\begin{aligned}
\mathbb{P}\left[\sup_{t \in [k\eta, (k+1)\eta]} \|B(t) - B(k\eta)\| \geq u\right] &= \mathbb{P}\left[\sup_{t \in [k\eta, (k+1)\eta]} \|B(t) - B(k\eta)\|^2 \geq u^2\right] \\
&\leq \sum_{i=1}^d \mathbb{P}\left[\sup_{t \in [k\eta, (k+1)\eta]} |[B(t) - B(k\eta)]_i|^2 \geq u^2/d\right] \\
&\leq \sum_{i=1}^d 2\mathbb{P}[|[B(1)]_i| \geq u/(d\eta)^{1/2}] \\
&\leq 2Cde^{-u^2/(d\eta)}.
\end{aligned}$$

Similarly, we have

$$\begin{aligned}
\mathbb{P}\left[\sup_{t \in [k\eta, (k+1)\eta]} \|L^\alpha(t) - L^\alpha(k\eta)\| \geq u\right] &\leq \sum_{i=1}^d 2\mathbb{P}[|[L^\alpha(1)]_i| \geq u/(d^{1/2}\eta^{1/\alpha})] \\
&\leq 2C_\alpha d^{1+\alpha/2} \eta u^{-\alpha}.
\end{aligned}$$

The constants  $C$  and  $C_\alpha$  do not depend on  $k$ , hence we have the conclusion.

□

**Lemma S3.** *The following estimates hold:*

$$\begin{aligned}\mathbb{P}\left[\max_{k \in [0, \dots, K-1]} \sup_{t \in [k\eta, (k+1)\eta]} \|B(t) - B(k\eta)\| \geq u\right] &\leq 1 - \left(1 - Cde^{-u^2/(d\eta)}\right)^K \\ \mathbb{P}\left[\max_{k \in [0, \dots, K-1]} \sup_{t \in [k\eta, (k+1)\eta]} \|L^\alpha(t) - L^\alpha(k\eta)\| \geq u\right] &\leq 1 - \left(1 - C_\alpha d^{1+\alpha/2} \eta u^{-\alpha}\right)^K.\end{aligned}$$

*Proof.* We have

$$\begin{aligned}\mathbb{P}\left[\max_{k \in [0, \dots, K-1]} \sup_{t \in [k\eta, (k+1)\eta]} \|B(t) - B(k\eta)\| \geq u\right] &= 1 - \mathbb{P}\left[\max_{k \in [0, \dots, K-1]} \sup_{t \in [k\eta, (k+1)\eta]} \|B(t) - B(k\eta)\| < u\right] \\ &= 1 - \prod_{k=0}^{K-1} \mathbb{P}\left[\sup_{t \in [k\eta, (k+1)\eta]} \|B(t) - B(k\eta)\| < u\right] \\ &= 1 - \prod_{k=0}^{K-1} \left(1 - \mathbb{P}\left[\sup_{t \in [k\eta, (k+1)\eta]} \|B(t) - B(k\eta)\| \geq u\right]\right) \\ &\leq 1 - \prod_{k=0}^{K-1} \left(1 - Cde^{-u^2/(d\eta)}\right) \\ &= 1 - \left(1 - Cde^{-u^2/(d\eta)}\right)^K.\end{aligned}$$

Similarly, we have

$$\mathbb{P}\left[\max_{k \in [0, \dots, K-1]} \sup_{t \in [k\eta, (k+1)\eta]} \|L^\alpha(t) - L^\alpha(k\eta)\| \geq u\right] \leq 1 - \left(1 - C_\alpha d^{1+\alpha/2} \eta u^{-\alpha}\right)^K.$$

□

**Lemma S4.** *Suppose that assumptions A3 and A4 hold. Then, for any  $\delta > 0$ , we have:*

$\mathbb{P}[(W(\eta), \dots, W(K\eta)) \in A] - \delta \leq \mathbb{P}[(\hat{W}(\eta), \dots, \hat{W}(K\eta)) \in A] \leq \mathbb{P}[(W(\eta), \dots, W(K\eta)) \in A] + \delta$ ,  
provided that

$$0 < \eta \leq \min \left\{ 1, \frac{m}{M^2}, \left(\frac{\delta^2}{2K_1 t^2}\right)^{\frac{1}{\gamma^2 + 2\gamma - 1}}, \left(\frac{\delta^2}{2K_2 t^2}\right)^{\frac{1}{2\gamma}}, \left(\frac{\delta^2}{2K_3 t^2}\right)^{\frac{\alpha}{2\gamma}}, \left(\frac{\delta^2}{2K_4 t^2}\right)^{\frac{1}{\gamma}} \right\},$$

*Proof.* By optimal coupling between two probability measure ([3], Theorem 5.2), there exists a coupling  $\mathbf{M}$  of  $(W(s))_{0 \leq s \leq K\eta}$  and  $(\hat{W}(s))_{0 \leq s \leq K\eta}$  such that

$$\mathbb{P}_{\mathbf{M}}[(W(s))_{0 \leq s \leq K\eta} \neq (\hat{W}(s))_{0 \leq s \leq K\eta}] = \|\mu_{K\eta} - \hat{\mu}_{K\eta}\|_{TV},$$

where  $TV$  denotes the total variation distance. By Pinsker's inequality, we also have

$$\|\mu_{K\eta} - \hat{\mu}_{K\eta}\|_{TV}^2 \leq \frac{1}{2} \text{KL}(\hat{\mu}_{K\eta}, \mu_{K\eta}).$$

Then,

$$\begin{aligned}\mathbb{P}_{\mathbf{M}}[(W(\eta), \dots, W(K\eta)) \neq (\hat{W}(\eta), \dots, \hat{W}(K\eta))] &\leq \mathbb{P}_{\mathbf{M}}[(W(s))_{0 \leq s \leq K\eta} \neq (\hat{W}(s))_{0 \leq s \leq K\eta}] \\ &\leq \left(\frac{1}{2} \text{KL}(\hat{\mu}_{K\eta}, \mu_{K\eta})\right)^{1/2}.\end{aligned}$$

From the following inequalities

$$\begin{aligned}\mathbb{P}_{\mathbf{M}}[(W(\eta), \dots, W(K\eta)) \in A] - \mathbb{P}_{\mathbf{M}}[(W(\eta), \dots, W(K\eta)) \neq (\hat{W}(\eta), \dots, \hat{W}(K\eta))] &\leq \mathbb{P}_{\mathbf{M}}[(\hat{W}(\eta), \dots, \hat{W}(K\eta)) \in A] \\ \mathbb{P}_{\mathbf{M}}[(\hat{W}(\eta), \dots, \hat{W}(K\eta)) \in A] &\leq \mathbb{P}_{\mathbf{M}}[(W(\eta), \dots, W(K\eta)) \in A] + \mathbb{P}_{\mathbf{M}}[(W(\eta), \dots, W(K\eta)) \neq (\hat{W}(\eta), \dots, \hat{W}(K\eta))],\end{aligned}$$

we arrive at

$$\begin{aligned}\mathbb{P}[(W(\eta), \dots, W(K\eta)) \in A] - \left(\frac{1}{2} \text{KL}(\hat{\mu}_{K\eta}, \mu_{K\eta})\right)^{1/2} &\leq \mathbb{P}[(\hat{W}(\eta), \dots, \hat{W}(K\eta)) \in A] \\ \mathbb{P}[(\hat{W}(\eta), \dots, \hat{W}(K\eta)) \in A] &\leq \mathbb{P}[(W(\eta), \dots, W(K\eta)) \in A] + \left(\frac{1}{2} \text{KL}(\hat{\mu}_{K\eta}, \mu_{K\eta})\right)^{1/2}.\end{aligned}$$

By Theorem 3, we have the desired inequalities.

□

### S3 Proof of Theorem 3

#### S3.1 A Girsanov-Type Change of Measures

In this section we will derive a Girsanov-type change of measure [4, 5] for the SDE considered in (6). Let  $\mathbb{P}$  denote the law of  $W(t)$  and  $\mathbb{Q}$  be an equivalent measure defined by

$$\frac{d\mathbb{Q}}{d\mathbb{P}} \Big|_{\mathcal{F}_T} = \exp \left( \int_0^T \phi_t dB_t - \frac{1}{2} \int_0^T \phi_t^2 dt \right), \quad (\text{S1})$$

where  $\mathcal{F}_T$  denotes the filtration upto time  $T$ . Then the process  $B^\phi$  defined by  $B^\phi(t) = B(t) - \int_0^t \phi_s ds$  is a  $\mathbb{Q}$ -Brownian motion. With the choice of  $\phi_t$  given in A2, we see that  $W$  satisfies  $dW(t) = b(W)dt + \varepsilon \sigma dB^\phi(t) + \varepsilon dL^\alpha(t)$ . Since this equation has a unique solution (constructed explicitly with the Euler scheme), we conclude that  $W$  has the same law under  $\mathbb{Q}$  as  $\hat{W}$  under  $\mathbb{P}$ .

We thus have:

$$\text{KL}(\hat{\mu}_t, \mu_t) = \text{KL}(\mathbb{P}_t, \mathbb{Q}_t) = \mathbb{E}^\mathbb{P} \left[ \log \frac{d\mathbb{P}}{d\mathbb{Q}} \Big|_{\mathcal{F}_t} \right] = \frac{1}{2\varepsilon^2 \sigma^2} \mathbb{E}^\mathbb{P} \left[ \int_0^t \|b(\hat{W}) + \nabla f(\hat{W}(s))\|^2 ds \right] \quad (\text{S2})$$

By using the same steps of the proof of [6][Lemma 3.6], we obtain

$$\text{KL}(\hat{\mu}_t, \mu_t) = \frac{1}{2\varepsilon^2 \sigma^2} \sum_{j=0}^{k-1} \int_{j\eta}^{(j+1)\eta} \mathbb{E} \|\nabla f(\hat{W}(s)) - \nabla f(\hat{W}(j\eta))\|^2 ds \quad (\text{S3})$$

$$\leq \frac{M^2}{2\varepsilon^2 \sigma^2} \sum_{j=0}^{k-1} \int_{j\eta}^{(j+1)\eta} \mathbb{E} \|\hat{W}(s) - \hat{W}(j\eta)\|^{2\gamma} ds. \quad (\text{S4})$$

#### S3.2 KL Bound for the Discretized Process

**Theorem S1.** *Under assumptions A3 and A4 we have, for  $0 < \eta \leq \min\{1, \frac{m}{M^2}\}$ ,*

$$\begin{aligned} \text{KL}(\hat{\mu}_t, \mu_t) &\leq \frac{M^2 3^\gamma}{2\varepsilon^2 \sigma^2} k\eta \left( CM^{2\gamma} \eta^{2\gamma} \left( \mathbb{E} \|\hat{W}(0)\|^{2\gamma^2} \right. \right. \\ &\quad + \frac{k-1}{2} \left( (2\eta(b+m))^{\gamma^2} + 2^{\gamma^2} (\eta B)^{2\gamma^2} + \varepsilon^{2\gamma^2} \eta^{\frac{2\gamma^2}{\alpha}} d \left( \frac{2^{2\gamma^2} \Gamma((1+2\gamma^2)/2) \Gamma(1-2\gamma^2/\alpha)}{\Gamma(1/2) \Gamma(1-\gamma^2)} \right) \right. \\ &\quad + \varepsilon^{2\gamma^2} \eta^{\gamma^2} d \left( 2^{\gamma^2} \frac{\Gamma(\frac{2\gamma^2+1}{2})}{\sqrt{\pi}} \right) \left. \left. \right) + \frac{B^2}{M^2} \right) + (\varepsilon \eta^{1/\alpha})^{2\gamma} d^{2\gamma} \left( \frac{2^{2\gamma} \Gamma((1+2\gamma)/2) \Gamma(1-2\gamma/\alpha)}{\Gamma(1/2) \Gamma(1-\gamma)} \right) \\ &\quad + (\varepsilon \eta^{1/2})^{2\gamma} d^{2\gamma} \left( 2^\gamma \frac{\Gamma(\frac{2\gamma+1}{2})}{\sqrt{\pi}} \right) \left. \right) \\ &\leq K_1 k^2 \eta^{1+2\gamma+\gamma^2} + K_2 k \eta^{1+2\gamma} + K_3 k \eta^{1+\frac{2\gamma}{\alpha}} + K_4 k \eta^{1+\gamma}, \end{aligned}$$

where

$$\begin{aligned} K_1 &\triangleq \frac{CM^{2+2\gamma} 3^\gamma}{\varepsilon^2 \sigma^2} \max \left\{ (2(b+m))^{\gamma^2}, 2^{\gamma^2} B^{2\gamma^2}, \varepsilon^{2\gamma^2} d \left( \frac{2^{2\gamma^2} \Gamma((1+2\gamma^2)/2) \Gamma(1-2\gamma^2/\alpha)}{\Gamma(1/2) \Gamma(1-\gamma^2)} \right), \right. \\ &\quad \left. \varepsilon^{2\gamma^2} d \left( 2^{\gamma^2} \frac{\Gamma(\frac{2\gamma^2+1}{2})}{\sqrt{\pi}} \right) \right\}, \\ K_2 &\triangleq \frac{CM^{2+2\gamma} 3^\gamma}{2\varepsilon^2 \sigma^2} \left( \mathbb{E} \|\hat{W}(0)\|^{2\gamma^2} + \frac{B^2}{M^2} \right), \\ K_3 &\triangleq \frac{M^2 3^\gamma \varepsilon^{2\gamma-2} d^{2\gamma}}{2\sigma^2} \left( \frac{2^{2\gamma} \Gamma((1+2\gamma)/2) \Gamma(1-2\gamma/\alpha)}{\Gamma(1/2) \Gamma(1-\gamma)} \right), \\ K_4 &\triangleq \frac{M^2 3^\gamma \varepsilon^{2\gamma-2} d^{2\gamma}}{2\sigma^2} \left( 2^\gamma \frac{\Gamma(\frac{2\gamma+1}{2})}{\sqrt{\pi}} \right). \end{aligned}$$

*Proof.* Let us consider the term  $\hat{W}(s) - \hat{W}(j\eta)$ , for  $s \in [j\eta, (j+1)\eta]$ :

$$\hat{W}(s) - \hat{W}(j\eta) = -(s - j\eta)\nabla f(\hat{W}(j\eta)) + \varepsilon(L_s - L_{j\eta}) + \varepsilon(B_s - B_{j\eta}) \quad (\text{S5})$$

$$\triangleq T_1 + T_2 + T_3 \quad (\text{S6})$$

Using this equation and (S4), we obtain:

$$\text{KL}(\hat{\mu}_t, \mu_t) \leq \frac{M^2}{2\varepsilon^2\sigma^2} \sum_{j=0}^{k-1} \int_{j\eta}^{(j+1)\eta} \mathbb{E} \|T_1 + T_2 + T_3\|^{2\gamma} ds \quad (\text{S7})$$

$$\leq \frac{M^2}{2\varepsilon^2\sigma^2} \sum_{j=0}^{k-1} \int_{j\eta}^{(j+1)\eta} \mathbb{E} \left( \|T_1 + T_2 + T_3\|^2 \right)^\gamma ds \quad (\text{S8})$$

$$\leq \frac{M^2}{2\varepsilon^2\sigma^2} \sum_{j=0}^{k-1} \int_{j\eta}^{(j+1)\eta} \mathbb{E} \left( 3\|T_1\|^2 + 3\|T_2\|^2 + 3\|T_3\|^2 \right)^\gamma ds \quad (\text{S9})$$

$$\leq \frac{M^2 3^\gamma}{2\varepsilon^2\sigma^2} \sum_{j=0}^{k-1} \int_{j\eta}^{(j+1)\eta} \mathbb{E} \left( \|T_1\|^{2\gamma} + \|T_2\|^{2\gamma} + \|T_3\|^{2\gamma} \right) ds \quad (\text{S10})$$

where (S9) is obtained from  $(a+b)^\gamma \leq a^\gamma + b^\gamma$  since  $\gamma \in (0, 1)$  and  $a, b \geq 0$ .

Since  $2\gamma > 1$ , we have by Lemma S6

$$\begin{aligned} \mathbb{E} \|T_2\|^{2\gamma} &= \mathbb{E} \|\varepsilon(s - j\eta)^{1/\alpha} L^\alpha(1)\|^{2\gamma} \\ &\leq (\varepsilon\eta^{1/\alpha})^{2\gamma} \mathbb{E} \|L^\alpha(1)\|^{2\gamma} \\ &\leq (\varepsilon\eta^{1/\alpha})^{2\gamma} d^{2\gamma} \left( \frac{2^{2\gamma} \Gamma((1+2\gamma)/2) \Gamma(1-2\gamma/\alpha)}{\Gamma(1/2) \Gamma(1-\gamma)} \right), \end{aligned}$$

and by Corollary S1,

$$\begin{aligned} \mathbb{E} \|T_3\|^{2\gamma} &= \mathbb{E} \|\varepsilon(s - j\eta)^{1/2} B(1)\|^{2\gamma} \\ &\leq (\varepsilon\eta^{1/2})^{2\gamma} \mathbb{E} \|B(1)\|^{2\gamma} \\ &\leq (\varepsilon\eta^{1/2})^{2\gamma} d^{2\gamma} \left( 2^\gamma \frac{\Gamma(\frac{2\gamma+1}{2})}{\sqrt{\pi}} \right), \end{aligned}$$

By definition, we have

$$\mathbb{E} \|T_1\|^{2\gamma} = \mathbb{E} \|(s - j\eta)\nabla f(\hat{W}(j\eta))\|^{2\gamma} \quad (\text{S11})$$

$$\leq \eta^{2\gamma} \mathbb{E} \|\nabla f(\hat{W}(j\eta))\|^{2\gamma} \quad (\text{S12})$$

$$\leq \eta^{2\gamma} \mathbb{E} (M \|\hat{W}(j\eta)\|^\gamma + B)^{2\gamma} \quad (\text{S13})$$

$$\leq CM^{2\gamma} \eta^{2\gamma} \mathbb{E} \left( \|\hat{W}(j\eta)\|_\gamma^\gamma + \left( \frac{B^{1/\gamma}}{M^{1/\gamma}} \right)^\gamma \right)^{2\gamma} \quad (\text{S14})$$

$$\leq CM^{2\gamma} \eta^{2\gamma} \mathbb{E} \left( \|\hat{W}'(j\eta)\|_\gamma^\gamma \right)^{2\gamma} \quad (\text{S15})$$

where we used the equivalence of  $\ell_p$ -norms and  $\hat{W}'(j\eta)$  is the concatenation of  $\hat{W}(j\eta)$  and  $\frac{B^{1/\gamma}}{M^{1/\gamma}}$ . We then obtain

$$\mathbb{E} \|T_1\|^{2\gamma} \leq CM^{2\gamma} \eta^{2\gamma} \mathbb{E} \|\hat{W}'(j\eta)\|_\gamma^{2\gamma^2} \quad (\text{S16})$$

$$\leq CM^{2\gamma} \eta^{2\gamma} \mathbb{E} \|\hat{W}'(j\eta)\|_{2\gamma^2}^{2\gamma^2} \quad (\text{S17})$$

$$= CM^{2\gamma} \eta^{2\gamma} \mathbb{E} \left( \|\hat{W}(j\eta)\|_{2\gamma^2}^{2\gamma^2} + \frac{B^2}{M^2} \right) \quad (\text{S18})$$

$$\leq CM^{2\gamma} \eta^{2\gamma} \left( \mathbb{E} \|\hat{W}(j\eta)\|^{2\gamma^2} + \frac{B^2}{M^2} \right). \quad (\text{S19})$$

By combining the above inequalities and Lemma S8, we obtain

$$\begin{aligned}
\text{KL}(\hat{\mu}_t, \mu_t) &\leq \frac{M^2 3^\gamma}{2\varepsilon^2 \sigma^2} \sum_{j=0}^{k-1} \int_{j\eta}^{(j+1)\eta} \mathbb{E} \left( \|T_1\|^{2\gamma} + \|T_2\|^{2\gamma} + \|T_3\|^{2\gamma} \right) ds \\
&\leq \frac{M^2 3^\gamma}{2\varepsilon^2 \sigma^2} \sum_{j=0}^{k-1} \int_{j\eta}^{(j+1)\eta} \left( CM^{2\gamma} \eta^{2\gamma} \left( \mathbb{E} \|\hat{W}(0)\|^{2\gamma^2} \right. \right. \\
&\quad + j \left( (2\eta(b+m))^{\gamma^2} + 2\gamma^2 (\eta B)^{2\gamma^2} + \varepsilon^{2\gamma^2} \eta^{\frac{2\gamma^2}{\alpha}} d \left( \frac{2^{2\gamma^2} \Gamma((1+2\gamma^2)/2) \Gamma(1-2\gamma^2/\alpha)}{\Gamma(1/2) \Gamma(1-\gamma^2)} \right) \right. \\
&\quad + \varepsilon^{2\gamma^2} \eta^{\gamma^2} d \left( 2^{\gamma^2} \frac{\Gamma\left(\frac{2\gamma^2+1}{2}\right)}{\sqrt{\pi}} \right) \left. \right) + \frac{B^2}{M^2} \left. \right) + (\varepsilon \eta^{1/\alpha})^{2\gamma} d^{2\gamma} \left( \frac{2^{2\gamma} \Gamma((1+2\gamma)/2) \Gamma(1-2\gamma/\alpha)}{\Gamma(1/2) \Gamma(1-\gamma)} \right) \\
&\quad + (\varepsilon \eta^{1/2})^{2\gamma} d^{2\gamma} \left( 2^\gamma \frac{\Gamma\left(\frac{2\gamma+1}{2}\right)}{\sqrt{\pi}} \right) \left. \right) ds \\
&= \frac{M^2 3^\gamma}{2\varepsilon^2 \sigma^2} k \eta \left( CM^{2\gamma} \eta^{2\gamma} \left( \mathbb{E} \|\hat{W}(0)\|^{2\gamma^2} \right. \right. \\
&\quad + \frac{k-1}{2} \left( (2\eta(b+m))^{\gamma^2} + 2\gamma^2 (\eta B)^{2\gamma^2} + \varepsilon^{2\gamma^2} \eta^{\frac{2\gamma^2}{\alpha}} d \left( \frac{2^{2\gamma^2} \Gamma((1+2\gamma^2)/2) \Gamma(1-2\gamma^2/\alpha)}{\Gamma(1/2) \Gamma(1-\gamma^2)} \right) \right. \\
&\quad + \varepsilon^{2\gamma^2} \eta^{\gamma^2} d \left( 2^{\gamma^2} \frac{\Gamma\left(\frac{2\gamma^2+1}{2}\right)}{\sqrt{\pi}} \right) \left. \right) + \frac{B^2}{M^2} \left. \right) + (\varepsilon \eta^{1/\alpha})^{2\gamma} d^{2\gamma} \left( \frac{2^{2\gamma} \Gamma((1+2\gamma)/2) \Gamma(1-2\gamma/\alpha)}{\Gamma(1/2) \Gamma(1-\gamma)} \right) \\
&\quad + (\varepsilon \eta^{1/2})^{2\gamma} d^{2\gamma} \left( 2^\gamma \frac{\Gamma\left(\frac{2\gamma+1}{2}\right)}{\sqrt{\pi}} \right) \left. \right).
\end{aligned}$$

By defining the constants  $K_1, K_2, K_3$  and  $K_4$  as in the statement of the Theorem, we directly have the conclusion.  $\square$

### S3.3 Proof of Theorem 3

*Proof.* By Theorem S1, we have

$$\text{KL}(\hat{\mu}_t, \mu_t) \leq K_1 k^2 \eta^{1+2\gamma+\gamma^2} + K_2 k \eta^{1+2\gamma} + K_3 k \eta^{1+\frac{2\gamma}{\alpha}} + K_4 k \eta^{1+\gamma}.$$

We can easily check that, for example, if  $0 < \eta \leq \left( \frac{\delta^2}{2K_1 t^2} \right)^{\frac{1}{\gamma^2+2\gamma-1}}$ , then  $K_1 k^2 \eta^{1+2\gamma+\gamma^2} \leq \frac{\delta^2}{2}$ . By the same arguments, we finally have

$$\begin{aligned}
\text{KL}(\hat{\mu}_t, \mu_t) &\leq \frac{\delta^2}{2} + \frac{\delta^2}{2} + \frac{\delta^2}{2} + \frac{\delta^2}{2} \\
&= 2\delta^2.
\end{aligned}$$

This finalizes the proof.  $\square$

## S4 Technical Results

**Lemma S5.** *Under assumptions A3 and A4 we have*

$$\|\nabla f(w)\| \leq M\|w\|^\gamma + B, \quad \forall w \in \mathbb{R}^d.$$

*Proof.* By assumption A3 we have

$$\|\nabla f(w) - \nabla f(0)\| \leq M\|w - 0\|^\gamma.$$

Since  $\|\nabla f(0)\| \leq B$  by assumption A4, the conclusion follows.  $\square$

The next lemma is the result on the moments of the noise  $L^\alpha(1)$ .

**Lemma S6.** *The quantity  $\mathbb{E}\|L^\alpha(1)\|^\lambda$  is finite for  $0 \leq \lambda < \alpha$ . For details, we have*

(a) *If  $1 < \lambda < \alpha$ , then*

$$\mathbb{E}\|L^\alpha(1)\|^\lambda \leq d^\lambda \left( \frac{2^\lambda \Gamma((1+\lambda)/2) \Gamma(1-\lambda/\alpha)}{\Gamma(1/2) \Gamma(1-\lambda/2)} \right).$$

(b) *If  $0 \leq \lambda \leq 1$ , then*

$$\mathbb{E}\|L^\alpha(1)\|^\lambda \leq d \left( \frac{2^\lambda \Gamma((1+\lambda)/2) \Gamma(1-\lambda/\alpha)}{\Gamma(1/2) \Gamma(1-\lambda/2)} \right).$$

*Proof.* This is exactly Corollary S3 in [2]. □

For the moments of the noise  $B(1)$ , we first have the following lemma.

**Lemma S7.** *Let  $X$  be a scalar standard Gaussian random variable. Then, for  $\lambda > -1$ , we have*

$$\mathbb{E}(|X|^\lambda) = 2^{\lambda/2} \frac{\Gamma(\frac{\lambda+1}{2})}{\sqrt{\pi}},$$

where  $\Gamma$  denotes the Gamma function.

*Proof.* The result is a direct consequence of equation (17) in [7]. □

**Corollary S1.** *The quantity  $\mathbb{E}\|B(1)\|^\lambda$  is finite for  $\lambda > -1$ . For details, we have*

(a) *If  $1 < \lambda < \alpha$ , then*

$$\mathbb{E}\|B(1)\|^\lambda \leq d^\lambda \left( 2^{\lambda/2} \frac{\Gamma(\frac{\lambda+1}{2})}{\sqrt{\pi}} \right).$$

(b) *If  $0 \leq \lambda \leq 1$ , then*

$$\mathbb{E}\|B(1)\|^\lambda \leq d \left( 2^{\lambda/2} \frac{\Gamma(\frac{\lambda+1}{2})}{\sqrt{\pi}} \right).$$

*Proof.* Since  $B(1)$ , by definition, is a  $d$ -dimensional vector whose components are i.i.d standard Gaussian random variable  $B_i(1)$  for  $i \in \{1, \dots, d\}$ , we have

$$\|B(1)\| \leq \sum_{i=1}^d |B_i(1)|$$

(a)  $1 < \lambda < \alpha$ . By using Minkowski's inequality and Lemma S7,

$$\begin{aligned} (\mathbb{E}\|B(1)\|^\lambda)^{1/\lambda} &\leq \left( \mathbb{E} \left[ \left( \sum_{i=1}^d |B_i(1)| \right)^\lambda \right] \right)^{1/\lambda} \\ &\leq \sum_{i=1}^d (\mathbb{E}|B_i(1)|^\lambda)^{1/\lambda} \\ &= d \left( 2^{\lambda/2} \frac{\Gamma(\frac{\lambda+1}{2})}{\sqrt{\pi}} \right)^{1/\lambda}. \end{aligned}$$

Thus, we have

$$\mathbb{E}\|B(1)\|^\lambda \leq d^\lambda \left( 2^{\lambda/2} \frac{\Gamma(\frac{\lambda+1}{2})}{\sqrt{\pi}} \right).$$



(b)  $0 \leq \lambda \leq 1$ .

$$\begin{aligned}\mathbb{E}\|B(1)\|^\lambda &\leq \mathbb{E}\left[\left(\sum_{i=1}^d |B_i(1)|\right)^\lambda\right] \\ &\leq \sum_{i=1}^d \mathbb{E}|B_i(1)|^\lambda \\ &= d \left(2^{\lambda/2} \frac{\Gamma(\frac{\lambda+1}{2})}{\sqrt{\pi}}\right).\end{aligned}$$

□

**Lemma S8.** For  $0 < \eta \leq \frac{m}{M^2}$  and  $s \in [j\eta, (j+1)\eta)$ , we have the following estimates:

(a) If  $1 < \lambda < \alpha$  then

$$\begin{aligned}\mathbb{E}\|\hat{W}(j\eta)\|^\lambda &\leq \left(\left(\mathbb{E}\|\hat{W}(0)\|^\lambda\right)^{\frac{1}{\lambda}} + j\left((2\eta(b+m))^{\frac{1}{2}} + 2^{\frac{1}{2}}\eta B + \varepsilon\eta^{\frac{1}{\alpha}}d\left(\frac{2^\lambda\Gamma((1+\lambda)/2)\Gamma(1-\lambda/\alpha)}{\Gamma(1/2)\Gamma(1-\lambda/2)}\right)^{\frac{1}{\lambda}}\right.\right. \\ &\quad \left.\left.+ \varepsilon\eta^{\frac{1}{2}}d\left(2^{\lambda/2}\frac{\Gamma(\frac{\lambda+1}{2})}{\sqrt{\pi}}\right)^{\frac{1}{\lambda}}\right)\right)^\lambda.\end{aligned}$$

(b) If  $0 \leq \lambda \leq 1$  then

$$\begin{aligned}\mathbb{E}\|\hat{W}(j\eta)\|^\lambda &\leq \mathbb{E}\|\hat{W}(0)\|^\lambda + j\left((2\eta(b+m))^{\frac{\lambda}{2}} + 2^{\frac{\lambda}{2}}(\eta B)^\lambda + \varepsilon^\lambda\eta^{\frac{\lambda}{\alpha}}d\left(\frac{2^\lambda\Gamma((1+\lambda)/2)\Gamma(1-\lambda/\alpha)}{\Gamma(1/2)\Gamma(1-\lambda/2)}\right)\right. \\ &\quad \left.+ \varepsilon^\lambda\eta^{\frac{\lambda}{2}}d\left(2^{\lambda/2}\frac{\Gamma(\frac{\lambda+1}{2})}{\sqrt{\pi}}\right)\right).\end{aligned}$$

*Proof.* The proof technique is similar to [2]. Let us denote the value  $\mathbb{E}\|L^\alpha(1)\|^\lambda$  by  $l_{\alpha,\lambda,d} < \infty$  and the value  $\mathbb{E}\|B(1)\|^\lambda$  by  $b_{\lambda,d} < \infty$ . Starting from

$$\hat{W}((j+1)\eta) = \hat{W}(j\eta) - \eta\nabla f(\hat{W}(j\eta)) + \varepsilon\eta^{\frac{1}{\alpha}}L^\alpha(1) + \varepsilon\eta^{\frac{1}{2}}B(1),$$

we have either, by Minkowski, for  $\lambda > 1$ ,

$$\left(\mathbb{E}\|\hat{W}((j+1)\eta)\|^\lambda\right)^{\frac{1}{\lambda}} \leq \left(\mathbb{E}\|\hat{W}(j\eta) - \eta\nabla f(\hat{W}(j\eta))\|^\lambda\right)^{\frac{1}{\lambda}} + \varepsilon\eta^{\frac{1}{\alpha}}\left(\mathbb{E}\|L^\alpha(1)\|^\lambda\right)^{\frac{1}{\lambda}} + \varepsilon\eta^{\frac{1}{2}}\left(\mathbb{E}\|B(1)\|^\lambda\right)^{\frac{1}{\lambda}}, \quad (\text{S20})$$

or for  $0 \leq \lambda \leq 1$ ,

$$\mathbb{E}\|\hat{W}((j+1)\eta)\|^\lambda \leq \mathbb{E}\|\hat{W}(j\eta) - \eta\nabla f(\hat{W}(j\eta))\|^\lambda + \varepsilon^\lambda\eta^{\frac{\lambda}{\alpha}}\mathbb{E}\|L^\alpha(1)\|^\lambda + \varepsilon^\lambda\eta^{\frac{\lambda}{2}}\mathbb{E}\|B(1)\|^\lambda. \quad (\text{S21})$$

Consider the first term on the right side:

$$\begin{aligned}\|\hat{W}(j\eta) - \eta\nabla f(\hat{W}(j\eta))\|^\lambda &= \|\hat{W}(j\eta) - \eta\nabla f(\hat{W}(j\eta))\|^{2 \times \frac{\lambda}{2}} \\ &= \left(\|\hat{W}(j\eta)\|^2 - 2\eta\langle \hat{W}(j\eta), \nabla f(\hat{W}(j\eta)) \rangle + \eta^2\|\nabla f(\hat{W}(j\eta))\|^2\right)^{\frac{\lambda}{2}} \\ &\leq \left(\|\hat{W}(j\eta)\|^2 - 2\eta(m\|\hat{W}(j\eta)\|^{1+\gamma} - b) + \eta^2(2M^2\|\hat{W}(j\eta)\|^{2\gamma} + 2B^2)\right)^{\frac{\lambda}{2}}, \quad (\text{S22})\end{aligned}$$

where we have used assumption **A5** and Lemma S5. For  $0 < \eta \leq \frac{m}{M^2}$ ,

$$2\eta m(\|\hat{W}(j\eta)\|^{1+\gamma} + 1) \geq 2\eta^2 M^2\|\hat{W}(j\eta)\|^{2\gamma}. \quad (\text{since } 1 + \gamma > 2\gamma \text{ and } \eta m > \eta^2 M^2)$$

Using this inequality we have

$$\begin{aligned}\|\hat{W}(j\eta) - \eta\nabla f(\hat{W}(j\eta))\|^\lambda &\leq \left(\|\hat{W}(j\eta)\|^2 + 2\eta(b+m) + 2\eta^2 B^2\right)^{\frac{\lambda}{2}} \\ &\leq \|\hat{W}(j\eta)\|^\lambda + (2\eta(b+m))^{\frac{\lambda}{2}} + 2^{\frac{\lambda}{2}}(\eta B)^\lambda.\end{aligned} \quad (\text{S23})$$

Consider the case where  $\lambda > 1$ . By (S20) and (S23),

$$\begin{aligned} \left( \mathbb{E} \|\hat{W}((j+1)\eta)\|^\lambda \right)^{\frac{1}{\lambda}} &\leq \left( \mathbb{E} \|\hat{W}(j\eta)\|^\lambda + (2\eta(b+m))^{\frac{\lambda}{2}} + 2^{\frac{\lambda}{2}}(\eta B)^\lambda \right)^{\frac{1}{\lambda}} + \varepsilon \eta^{\frac{1}{\alpha}} \left( \mathbb{E} \|L^\alpha(1)\|^\lambda \right)^{\frac{1}{\lambda}} + \varepsilon \eta^{\frac{1}{2}} \left( \mathbb{E} \|B(1)\|^\lambda \right)^{\frac{1}{\lambda}} \\ &\leq \left( \mathbb{E} \|\hat{W}(j\eta)\|^\lambda \right)^{\frac{1}{\lambda}} + (2\eta(b+m))^{\frac{1}{2}} + 2^{\frac{1}{2}}\eta B + \varepsilon \eta^{\frac{1}{\alpha}} l_{\alpha,\lambda,d}^{\frac{1}{\lambda}} + \varepsilon \eta^{\frac{1}{2}} b_{\lambda,d}^{\frac{1}{\lambda}} \\ &\leq \left( \mathbb{E} \|\hat{W}(0)\|^\lambda \right)^{\frac{1}{\lambda}} + (j+1) \left( (2\eta(b+m))^{\frac{1}{2}} + 2^{\frac{1}{2}}\eta B + \varepsilon \eta^{\frac{1}{\alpha}} l_{\alpha,\lambda,d}^{\frac{1}{\lambda}} + \varepsilon \eta^{\frac{1}{2}} b_{\lambda,d}^{\frac{1}{\lambda}} \right). \end{aligned}$$

For the case where  $0 \leq \lambda \leq 1$ , by (S21) and (S23),

$$\begin{aligned} \mathbb{E} \|\hat{W}((j+1)\eta)\|^\lambda &\leq \mathbb{E} \|\hat{W}(j\eta)\|^\lambda + (2\eta(b+m))^{\frac{\lambda}{2}} + 2^{\frac{\lambda}{2}}(\eta B)^\lambda + \varepsilon^\lambda \eta^{\frac{\lambda}{\alpha}} l_{\alpha,\lambda,d} + \varepsilon^\lambda \eta^{\frac{\lambda}{2}} b_{\lambda,d} \\ &\leq \mathbb{E} \|\hat{W}(0)\|^\lambda + (j+1) \left( (2\eta(b+m))^{\frac{\lambda}{2}} + 2^{\frac{\lambda}{2}}(\eta B)^\lambda + \varepsilon^\lambda \eta^{\frac{\lambda}{\alpha}} l_{\alpha,\lambda,d} + \varepsilon^\lambda \eta^{\frac{\lambda}{2}} b_{\lambda,d} \right). \end{aligned}$$

By using Lemma S6 and Corollary S1, we have the desired results. □

## S5 Details of the Simulations

We run the experiments for different values of the other parameters of the problem. The detailed settings of the parameters are as follows.

Figure 2(a)  $d = 10$ ,  $\alpha \in \{1.2, 1.4, 1.6, 1.8\}$ ,  $\varepsilon = 0.1$ ,  $\sigma = 1$ ,  $a = 4 \times 10^{-4}$ .

Figure 2(b)  $d = 10$ ,  $\alpha \in \{1.2, 1.4, 1.6, 1.8\}$ ,  $\varepsilon \in \{10^{-3}, 10^{-2}, 10^{-1}, 10\}$ ,  $\sigma = 1$ ,  $a = 4 \times 10^{-6}$ .

Figure 2(c)  $d = 10$ ,  $\alpha \in \{1.2, 1.4, 1.6, 1.8\}$ ,  $\varepsilon = 0.1$ ,  $\sigma \in \{10^{-2}, 10^{-1}, 1, 10\}$ ,  $a = 4 \times 10^{-5}$ .

Figure 2(d)  $d \in \{10, 40, 70, 100\}$ ,  $\alpha \in \{1.2, 1.4, 1.6, 1.8\}$ ,  $\varepsilon = 0.1$ ,  $\sigma = 1$ ,  $a = 4 \times 10^{-4}$ .

## S6 First Exit Times of Non-linear Dynamical Systems in $\mathbb{R}^d$ Perturbed by Multifractal Lévy Noise [8]

In this paper, the authors study a dynamical system which is perturbed by a  $d$ -dimensional Lévy process with  $\alpha_i$ -stable components. The authors investigate the exit behavior of the system from a domain  $\mathcal{G}$  in the small noise limit and they prove that the system exits from the domain in the direction of the process with smallest  $\alpha_i$ . The main results of the paper are presented in Theorem 1, Proposition 1, Proposition 2 of the paper.

## References

- [1] Longjie Xie and Xicheng Zhang. Ergodicity of stochastic differential equations with jumps and singular coefficients. *arXiv preprint arXiv:1705.07402*, 2017.
- [2] Thanh Huy Nguyen, Umut Şimşekli, and Gaël Richard. Non-Asymptotic Analysis of Fractional Langevin Monte Carlo for Non-Convex Optimization. In *International Conference on Machine Learning*, 2019.
- [3] Torgny Lindvall. *Lectures on the coupling method*. Courier Corporation, 2002.
- [4] Bernt Karsten Øksendal and Agnes Sulem. *Applied stochastic control of jump diffusions*, volume 498. Springer, 2005.
- [5] Peter Tankov. *Financial modelling with jump processes*. Chapman and Hall/CRC, 2003.
- [6] M. Raginsky, A. Rakhlin, and M. Telgarsky. Non-convex learning via stochastic gradient Langevin dynamics: a nonasymptotic analysis. In *Proceedings of the 2017 Conference on Learning Theory*, volume 65, pages 1674–1703, 2017.
- [7] Andreas Winkelbauer. Moments and absolute moments of the normal distribution. *arXiv preprint arXiv:1209.4340*, 2012.
- [8] Peter Imkeller, Ilya Pavlyukevich, and Michael Stauch. First exit times of non-linear dynamical systems in  $\mathbb{R}^d$  perturbed by multifractal Lévy noise. *Journal of Statistical Physics*, 141(1):94–119, 2010.
